# Supplementary material for: Conversion of nonporous helical cadmium organic framework to a porous form
Source: Royal Society of Chemistry journal article supplement (doi:10.1039/c0cc01042a), 2010-01-01
Supplement: c0cc01042a.pdf [file c0cc01042a.pdf]

## Supporting Information

### Conversion of Nonporous Helical Cadmium Organic Framework to a Porous Form

Zhi-Gang Gu,<sup>†</sup> Yue-Peng Cai,<sup>\*†</sup> Hua-Cai Fang,<sup>†</sup> Zheng-Yuan Zhou,<sup>†</sup> Praveen K. Thallapally<sup>\*.b</sup>  
Jian Tian<sup>b</sup>, Jun Liu<sup>b</sup> and Gregory J. Exarhos<sup>b</sup>

*School of chemistry and environment, Key Lab of Technology on Electrochemical Energy Storage and Power Generation in Guangdong Universities, Engineering Research Center of Materials and Technology for Electrochemical Energy Storage (Ministry of Education), South China University Guangzhou 510006, and Energy and Environment Directorate Pacific Northwest National Laboratory 902 Battelle Boulevard P.O. Box 999, MSIN K6-81 Richland, WA 99352 USA*

[E-mail: ypcai8@yahoo.com](mailto:ypcai8@yahoo.com), [praveen.thallapally@pnl.gov](mailto:praveen.thallapally@pnl.gov)

**Materials and physical measurements:** All reagents were commercially available and used without further purification. Infrared spectra were obtained from KBr pellets on a Bruker TENSOR 27 Fourier transformation infrared spectrometer in the 400-4000 cm<sup>-1</sup> region. Elemental analyses (C, H, N) were performed on a Perkin-Elmer 240 elemental analyzer. Powder X-ray diffraction (PXRD) data were recorded on a Rigaku D/M-2200T automated diffractometer. The luminescent spectra for the solid state were recorded at room temperature on an Aminco Bowman Series 2 spectrofluorometer with a xenon arc lamp as the light source. In the measurements of emission and excitation spectra the pass width is 5.0 nm. Thermal analyses (under oxygenated atmosphere, heating rate of 5 °C/min) were carried out in a Labsys NETZSCH TG 209 Setaram apparatus.

**Crystallographic Studies:** X-ray diffraction data were collected on a Bruker Apex II diffractometer with graphite monochromated Mo-K $\alpha$  radiation ( $\lambda = 0.71073 \text{ \AA}$ ) at 298 K. Absorption corrections were applied by using multiscan program SADABS. All

the structures were solved by direct methods and refined with full-matrix least-squares technique using SHELXTL. All non-hydrogen atoms were refined with anisotropic displacement parameters. Hydrogen atoms on organic ligands were generated by the riding mode (C-H 0.96 Å), and hydrogen atoms on water molecules were located from difference maps.

**Synthesis of compound [Cd(HImDC)(Im)]<sub>n</sub> (1).** A mixture of H<sub>3</sub>ImDC (0.078 g, 0.50 mmol), Im (0.066 g, 1 mmol), and Cd(NO<sub>3</sub>)<sub>2</sub> (0.122 g, 0.5 mmol), deionized water 10 mL were sealed in 20 mL Teflon-lined stainless steel vessel and heated to about 170 °C for 72 h, and then cooled to room temperature (at a rate of 0.5 °C min<sup>-1</sup>). The pH values of the solution before and after reactions are ca. 6, respectively. The colorless crystals obtained were washed twice with Et<sub>2</sub>O to give pure product with the formula C<sub>8</sub>H<sub>6</sub>CdN<sub>4</sub>O<sub>4</sub> and dried in air. C, H, N analysis (%) for the compound: calcd: C 28.69, H 1.79, N 16.74; found: C 28.61, H 1.82, N 16.83. IR (KBr, cm<sup>-1</sup>): ν 3438 (br, m), 3168 (br, m), 3124 (w), 2952 (w), 2716 (w), 1672(m), 1541 (vs), 1491(vs), 1436 (s), 1328(m), 1256(s), 1111(m), 1070(s), 1009 (m), 941 (w), 873 (w), 840 (w), 786(w), 759(m), 658(m), 622(w), 526(w).

**Synthesis of compound [Cd(HImDC)(Py)]<sub>n</sub> (2).** Similar to the method for the preparation of compound **1**, compound **2** can not be obtained. Accordingly, compound **2** was only synthesised by the colorless single crystals of compound **1** being immersed in pyridine under refluxing for 5 hours, during the process the crystals was gradually dissolved. When temperature decreased to room temperature at 10 °C h<sup>-1</sup> and pale yellow single crystals of **2** with the formula C<sub>10</sub>H<sub>7</sub>CdN<sub>3</sub>O<sub>4</sub> were obtain and dried in air. C, H, N analysis (%) for the compound: calcd: C 34.72, H 2.03, N 12.15; found: C 34.63, H 2.11, N 12.23. IR (KBr, cm<sup>-1</sup>): ν 3448 (br, s), 2968 (br, s), 2334 (m), 1672(m), 1574 (vs), 1477(vs), 1379 (s), 1308(m), 1254 (m), 1238 (w), 1110(s), 999 (m), 945 (w), 862(m), 829 (w), 814 (w), 793 (w), 783(m), 663(m), 521(w), 491 (w).

**Figure S1** A view of 3D metal-organic open framework in compound [Cd(HImDC)(Im)]<sub>n</sub> in *ab* plane for **1** (a) and **2** (b), respectively. (c) A 8<sup>3</sup> topology of the three-connected network of the complex [Cd(HImDC)(Im)]<sub>n</sub> viewed along the *a* axis.

(a)



(b)



(c)



Complex 1



Complex 2



Table S1 Crystal data and structure refinement for compounds **1** and **2**.

| Complex                                                                                                                                                                                                                                                                                          | <b>1</b>                                                       | <b>2</b>                                                        |
|--------------------------------------------------------------------------------------------------------------------------------------------------------------------------------------------------------------------------------------------------------------------------------------------------|----------------------------------------------------------------|-----------------------------------------------------------------|
| Empirical formula                                                                                                                                                                                                                                                                                | C <sub>8</sub> H <sub>6</sub> N <sub>4</sub> O <sub>4</sub> Cd | C <sub>10</sub> H <sub>7</sub> N <sub>3</sub> O <sub>4</sub> Cd |
| Formula weight                                                                                                                                                                                                                                                                                   | 334.57                                                         | 345.59                                                          |
| Temperature                                                                                                                                                                                                                                                                                      | 298(2) K                                                       | 298(2) K                                                        |
| Wavelength                                                                                                                                                                                                                                                                                       | 0.71073 Å                                                      | 0.71073 Å                                                       |
| Crystal system                                                                                                                                                                                                                                                                                   | Trigonal                                                       | Trigonal                                                        |
| Space group                                                                                                                                                                                                                                                                                      | <i>R3c</i>                                                     | <i>R3c</i>                                                      |
| Unit cell dimensions                                                                                                                                                                                                                                                                             |                                                                |                                                                 |
| <i>a</i> (Å)                                                                                                                                                                                                                                                                                     | 20.6556(6)                                                     | 21.1266(16)                                                     |
| <i>b</i> (Å)                                                                                                                                                                                                                                                                                     | 20.6556(6)                                                     | 21.1266(16)                                                     |
| <i>c</i> (Å)                                                                                                                                                                                                                                                                                     | 13.3915(7)                                                     | 13.967(2)                                                       |
| $\alpha$ (°)                                                                                                                                                                                                                                                                                     | 90                                                             | 90                                                              |
| $\beta$ (°)                                                                                                                                                                                                                                                                                      | 90                                                             | 90                                                              |
| $\gamma$ (°)                                                                                                                                                                                                                                                                                     | 120                                                            | 120                                                             |
| <i>V</i> (Å <sup>3</sup> )                                                                                                                                                                                                                                                                       | 4948.1(3)                                                      | 5398.9(10)                                                      |
| <i>Z</i>                                                                                                                                                                                                                                                                                         | 18                                                             | 18                                                              |
| $\rho$ (calcd.) (mg m <sup>-3</sup> )                                                                                                                                                                                                                                                            | 2.021                                                          | 1.913                                                           |
| $\mu$ (m <sup>-1</sup> )                                                                                                                                                                                                                                                                         | 1.995                                                          | 1.830                                                           |
| <i>F</i> (000)                                                                                                                                                                                                                                                                                   | 2916                                                           | 3024                                                            |
| Crystal size (mm)                                                                                                                                                                                                                                                                                | 0.26 × 0.22 × 0.15                                             | 0.22 × 0.16 × 0.11                                              |
| $\theta$ range for data collection (°)                                                                                                                                                                                                                                                           | 1.97 to 25.48                                                  | 1.93 to 25.16                                                   |
| <i>h</i> / <i>k</i> / <i>l</i> (max, min)                                                                                                                                                                                                                                                        | -21,24/-24,18/-16,12                                           | -24,14/-24,25/-16,16                                            |
| Reflections collected                                                                                                                                                                                                                                                                            | 8347                                                           | 8802                                                            |
| Unique                                                                                                                                                                                                                                                                                           | 1913[R(int) = 0.0283]                                          | 2151[R(int) = 0.0235]                                           |
| Completeness to $\theta = 27.13$                                                                                                                                                                                                                                                                 | 100 %                                                          | 100 %                                                           |
| Absorption correction                                                                                                                                                                                                                                                                            | empirical                                                      | empirical                                                       |
| Max. and min. transmission                                                                                                                                                                                                                                                                       | full-matrix least-squares on <i>F</i> <sup>2</sup>             | full-matrix least-squares on <i>F</i> <sup>2</sup>              |
| Data / restraints / parameters                                                                                                                                                                                                                                                                   | 1913 / 1 / 155                                                 | 2151 / 1 / 164                                                  |
| Goodness-of-fit on <i>F</i> <sup>2</sup>                                                                                                                                                                                                                                                         | 1.048                                                          | 1.043                                                           |
| Final <i>R</i> <sup>a</sup> , <i>wR</i> <sup>b</sup> indices                                                                                                                                                                                                                                     | 0.0180, 0.0373                                                 | 0.0168, 0.0407                                                  |
| [ <i>I</i> > 2 $\sigma$ ( <i>I</i> ) ]                                                                                                                                                                                                                                                           |                                                                |                                                                 |
| <i>R</i> <sub>1</sub> , <i>wR</i> <sub>2</sub> indices (all data)                                                                                                                                                                                                                                | 0.0196, 0.0380                                                 | 0.0177, 0.0413                                                  |
| Largest diff. Peak and hole (e Å <sup>-3</sup> )                                                                                                                                                                                                                                                 | 0.326/ -0.209                                                  | 0.256/ -0.481                                                   |
| <sup>a</sup> $R = \sum   F_o  -  F_c /S F_o $ . <sup>b</sup> $wR = [\sum w( F_o ^2 -  F_c ^2)^2 / \sum w(F_o^2)^2]^{1/2}$ . $w = 1/[\sigma^2(F_o^2) + (0.0214P)^2 + 4.1856P]$ for <b>1</b> and $w = 1/[\sigma^2(F_o^2) + (0.0213P)^2 + 3.8889P]$ for <b>2</b> , where $P = (F_o^2 + 2F_c^2)/3$ . |                                                                |                                                                 |

Table S2. Selected atomic distances (Å) and bond angles (°) for compounds **1** and **2**<sup>a</sup>.

| <b>1</b>          |            |                     |            |
|-------------------|------------|---------------------|------------|
| Cd(1)-N(2)#1      | 2.180(3)   | N(1)-Cd(1)-N(3)     | 102.63(13) |
| Cd(1)-N(1)        | 2.191(3)   | N(2)#1-Cd(1)-O(4)#2 | 101.66(12) |
| Cd(1)-N(3)        | 2.295(4)   | N(1)-Cd(1)-O(4)#2   | 99.28(12)  |
| Cd(1)-O(4)#2      | 2.404(3)   | N(3)-Cd(1)-O(4)#2   | 95.21(12)  |
| Cd(1)-O(3)#2      | 2.553(3)   | N(2)#1-Cd(1)-O(3)#2 | 97.26(12)  |
| Cd(1)-O(1)        | 2.576(3)   | N(1)-Cd(1)-O(3)#2   | 80.99(12)  |
| N(2)#1-Cd(1)-N(1) | 151.89(12) | N(3)-Cd(1)-O(3)#2   | 147.14(12) |
| N(2)#1-Cd(1)-N(3) | 93.96(14)  | O(4)#2-Cd(1)-O(3)#2 | 52.29(11)  |
| N(2)#1-Cd(1)-O(1) | 88.58(11)  | N(1)-Cd(1)-O(1)     | 68.87(11)  |
| N(3)-Cd(1)-O(1)   | 90.86(12)  | O(4)#2-Cd(1)-O(1)   | 167.68(10) |
| O(3)#2-Cd(1)-O(1) | 120.12(11) |                     |            |
| <b>2</b>          |            |                     |            |
| Cd(1)-N(2)#3      | 2.205(2)   | N(2)#3-Cd(1)-N(1)   | 161.61(9)  |
| Cd(1)-N(1)        | 2.221(2)   | N(2)#3-Cd(1)-O(3)#4 | 100.67(9)  |
| Cd(1)-N(3)        | 2.363(3)   | N(1)-Cd(1)-O(3)#4   | 86.43(9)   |
| Cd(1)-O(3)#4      | 2.322(2)   | N(2)#3-Cd(1)-N(3)   | 88.13(9)   |
| Cd(1)-O(1)        | 2.526(3)   | N(1)-Cd(1)-N(3)     | 98.28(9)   |
| N(2)#3-Cd(1)-O(1) | 93.26(9)   | O(3)#4-Cd(1)-N(3)   | 136.94(10) |
| N(1)-Cd(1)-O(1)   | 69.73(8)   | O(3)#4-Cd(1)-O(1)   | 131.40(9)  |
| N(3)-Cd(1)-O(1)   | 89.35(10)  |                     |            |

<sup>a</sup>Symmetry transformations used to generate equivalent atoms: #1  $x-1/3, x-y+1/3, z-1/6$ ; #2  $-y+4/3, -x+5/3, z+1/6$ ; #3  $-y+1/3, -x+2/3, z+1/6$ ; #4  $x-1/3, x-y-2/3, z-1/6$ .

Table S3 Distances (Å) and angles (°) of hydrogen bonds for the compounds **1-2**.

| D-H...A            | d(H...A) | d(D...A) | ∠D-H...A |
|--------------------|----------|----------|----------|
| <b>1</b>           |          |          |          |
| O(2)-H(2)...O(3)   | 1.702(2) | 2.485(5) | 159(6)   |
| N(4)-H(7)...O(1)#1 | 1.978(2) | 2.833(4) | 173(6)   |
| <b>2</b>           |          |          |          |
| O(2)-H(2)...O(3)   | 1.720(2) | 2.523(3) | 164(5)   |
| O1W-H1W...O1W#2    | 2.163(2) | 2.774(3) | 132(6)   |

\*Symmetry transformation used to generate equivalent atoms: #1  $-y+1, -x+1, -z+1/2$ ; #2  $y+1/4, -x+1/4, z+1/4$ .

**Figure S2.** The coordination environments of Cd1 in two compounds **1** and **2** with symmetric codes: a)  $5/3-x, 4/3-y, 1/6+z$ ; b)  $-1/3+x, 1/3+x-y, -1/6+z$ ; c)  $-1/3+x, -2/3+x-y, -1/6+z$ ; d)  $-1/3-y, 2/3-x, 1/6+z$ ; e)  $2/3-x+y, 1/3-x, 1/3+z$ ; f)  $2/3-y, 1/3-x, -1/6+z$ ; g)  $1/3+x, -1/3+x-y, 1/6+z$ ; h)  $1/3-x, -1/3+x-y, -1/3+z$ .

(a)



(b)



**Figure S3.** The new coordination mode ( $\mu^3$ -) of the ligand HImDC<sup>2-</sup> in compounds **1** and **2**.



**Figure S4.** The TG and DSC curves of two compounds: (a) for **1** and (b) for **2**.

(a)



(b)



**Figure S5.** Powder X-ray diffraction (PXRD) patterns for complexes **1** and **2** collected at different temperatures.

for complex **1**: (a) Simulated; (b) 100°C; (c) 275°C; (d) 360°C.

for complex **2**: (a) 25 °C; (b) 120 °C; (c) 220 °C; (d) 330 °C; (e) 350 °C and simulated at the bottom.

### Complex 1



### Complex 2



### Complex 2 simulated



## checkCIF/PLATON report (publication check)

No syntax errors found.  
Please wait while processing ....

[CIF dictionary](#)  
[Interpreting this report](#)

### Datablock: CCDC 717400

---

|                 |                                        |                    |
|-----------------|----------------------------------------|--------------------|
| Bond precision: | C-C = 0.0060 Å                         | Wavelength=0.71073 |
| Cell:           | a=20.6556(6) b=20.6556(6) c=13.3915(7) |                    |
|                 | alpha=90 beta=90 gamma=120             |                    |
| Temperature:    | 298 K                                  |                    |

  

|                | Calculated     | Reported       |
|----------------|----------------|----------------|
| Volume         | 4948.1(3)      | 4948.1(3)      |
| Space group    | R 3 c          | R 3 c          |
| Hall group     | R 3 -2" c      | R 3 -2" c      |
| Moiety formula | C8 H6 Cd N4 O4 | C8 H6 Cd N4 O4 |
| Sum formula    | C8 H6 Cd N4 O4 | C8 H6 Cd N4 O4 |
| Mr             | 334.58         | 334.57         |
| Dx, g cm-3     | 2.021          | 2.021          |
| Z              | 18             | 18             |
| Mu (mm-1)      | 1.995          | 1.995          |
| F000           | 2916.0         | 2916.0         |
| F000'          | 2902.66        |                |
| h, k, lmax     | 24, 24, 16     | 24, 24, 16     |
| Nref           | 1002 [ 1992]   | 1870           |
| Tmin, Tmax     | 0.601, 0.741   | 0.625, 0.754   |
| Tmin'          | 0.589          |                |

Correction method= MULTI-SCAN  
Data completeness= 1.87/0.94 Theta(max)= 25.240  
R(reflections)= 0.0180 ( 1794) wR2(reflections)= 0.0380 ( 1870)  
S = 1.048 Npar= 155

---

The following ALERTS were generated. Each ALERT has the format  
[test-name\\_ALERT\\_alert-type\\_alert-level](#).  
Click on the hyperlinks for more details of the test.

#### Alert level C

[PLAT232\\_ALERT\\_2\\_C](#) Hirshfeld Test Diff (M-X) Cd1 -- O1 .. 6.12 su  
[PLAT232\\_ALERT\\_2\\_C](#) Hirshfeld Test Diff (M-X) Cd1 -- O3\_i .. 5.34 su  
[PLAT232\\_ALERT\\_2\\_C](#) Hirshfeld Test Diff (M-X) Cd1 -- O4\_i .. 5.68 su  
[PLAT601\\_ALERT\\_2\\_C](#) Structure Contains Solvent Accessible VOIDS of . 48.00 A\*\*3

#### Alert level G

[REFLT03\\_ALERT\\_4\\_G](#) Please check that the estimate of the number of Friedel pairs is correct. If it is not, please give the correct count in the \_publ\_section\_exptl\_refinement section of the submitted CIF.  
From the CIF: \_diffn\_reflns\_theta\_max 25.24  
From the CIF: \_reflns\_number\_total 1870  
Count of symmetry unique reflns 1002  
Completeness (\_total/calc) 186.63%  
TEST3: Check Friedels for noncentro structure  
Estimate of Friedel pairs measured 868  
Fraction of Friedel pairs measured 0.866  
Are heavy atom types Z>Si present yes  
[PLAT764\\_ALERT\\_4\\_G](#) Overcomplete CIF Bond List Detected (Rep/Expd) . 1.14 Ratio  
[PLAT850\\_ALERT\\_4\\_G](#) Check Flack Parameter Exact Value 0.00 and su .. 0.02

0 ALERT level A = In general: serious problem  
0 ALERT level B = Potentially serious problem  
4 ALERT level C = Check and explain  
3 ALERT level G = General alerts; check

0 ALERT type 1 CIF construction/syntax error, inconsistent or missing data  
4 ALERT type 2 Indicator that the structure model may be wrong or deficient  
0 ALERT type 3 Indicator that the structure quality may be low  
3 ALERT type 4 Improvement, methodology, query or suggestion  
0 ALERT type 5 Informative message, check

## checkCIF/PLATON report (publication check)

No syntax errors found.  
Please wait while processing ....

[CIF dictionary](#)  
[Interpreting this report](#)

### Datablock: [CCDC 773501](#)

---

|                    |                                         |                                  |
|--------------------|-----------------------------------------|----------------------------------|
| Bond precision:    | C-C = 0.0051 A                          | Wavelength=0.71073               |
| Cell:              | a=21.1266(16) b=21.1266(16) c=13.967(2) |                                  |
|                    | alpha=90 beta=90 gamma=120              |                                  |
| Temperature:       | 298 K                                   |                                  |
|                    | Calculated                              | Reported                         |
| Volume             | 5398.8(10)                              | 5398.9(10)                       |
| Space group        | R 3 c                                   | R3c                              |
| Hall group         | R 3 -2" c                               | ?                                |
| Moiety formula     | C10 H7 Cd N3 O4                         | C10 H7 Cd N3 O4                  |
| Sum formula        | C10 H7 Cd N3 O4                         | C10 H7 Cd N3 O4                  |
| Mr                 | 345.60                                  | 345.59                           |
| Dx, g cm-3         | 1.913                                   | 1.913                            |
| Z                  | 18                                      | 18                               |
| Mu (mm-1)          | 1.830                                   | 1.830                            |
| F000               | 3024.0                                  | 3024.0                           |
| F000'              | 3010.74                                 |                                  |
| h, k, lmax         | 25, 25, 16                              | 25, 25, 16                       |
| Nref               | 1090 [ 2168]                            | 2151                             |
| Tmin, Tmax         | 0.711, 0.818                            | 0.689, 0.824                     |
| Tmin'              | 0.662                                   |                                  |
| Correction method= | MULTI-SCAN                              |                                  |
| Data completeness= | 1.97/0.99                               | Theta(max)= 25.160               |
| R(reflections)=    | 0.0168 ( 2085)                          | wR2(reflections)= 0.0413 ( 2151) |
| S =                | 1.043                                   | Npar= 164                        |

---

The following ALERTS were generated. Each ALERT has the format  
[test-name\\_ALERT\\_alert-type\\_alert-level](#).  
Click on the hyperlinks for more details of the test.

#### ● Alert level C

|                                   |                                                  |            |
|-----------------------------------|--------------------------------------------------|------------|
| <a href="#">PLAT232_ALERT_2_C</a> | Hirshfeld Test Diff (M-X) Cd1 -- O1 ..           | 7.57 su    |
| <a href="#">PLAT241_ALERT_2_C</a> | Check High Ueq as Compared to Neighbors for      | O1         |
| <a href="#">PLAT601_ALERT_2_C</a> | Structure Contains Solvent Accessible VOIDS of . | 59.00 A**3 |
| <a href="#">PLAT125_ALERT_4_C</a> | No _symmetry_space_group_name_Hall Given .....   | ?          |

---

#### ● Alert level G

[REFLT03\\_ALERT\\_4\\_G](#) Please check that the estimate of the number of Friedel pairs is correct. If it is not, please give the correct count in the \_publ\_section\_exptl\_refinement section of the submitted CIF.

|                                               |         |
|-----------------------------------------------|---------|
| From the CIF: _diffrn_reflns_theta_max        | 25.16   |
| From the CIF: _reflns_number_total            | 2151    |
| Count of symmetry unique reflns               | 1090    |
| Completeness ( _total/calc)                   | 197.34% |
| TEST3: Check Friedels for noncentro structure |         |
| Estimate of Friedel pairs measured            | 1061    |
| Fraction of Friedel pairs measured            | 0.973   |
| Are heavy atom types Z>Si present             | yes     |

|                                   |                                          |          |
|-----------------------------------|------------------------------------------|----------|
| <a href="#">PLAT232_ALERT_2_G</a> | Hirshfeld Test Diff (M-X) Cd1 -- O4_p .. | 19.85 su |
|-----------------------------------|------------------------------------------|----------|

---

### Crystallographic Data

Crystal data: For **1**, 298(2) K, rhombohedral  $R3c$ ,  $a = 20.6556(6)$  Å,  $b = 20.6556(6)$  Å,  $c = 13.3915(7)$  Å,  $\gamma = 120^\circ$ ,  $V = 4948.1(3)$  Å<sup>3</sup>,  $Z = 18$ ,  $D_c = 2.021$  Mg/m<sup>3</sup>, final  $R_1 = 0.0204$  [ $I > 2\sigma(I)$ ],  $wR_2 = 0.0467$  (all data),  $S = 1.082$ . For **2**, 298(2) K, rhombohedral  $R3c$ ,  $a = 21.1266(16)$  Å,  $b = 21.1266(16)$  Å,  $c = 13.967(2)$  Å,  $\gamma = 120^\circ$ ,  $V = 5398.9(10)$  Å<sup>3</sup>,  $Z = 18$ ,  $D_c = 1.913$  Mg/m<sup>3</sup>, final  $R_1 = 0.0168$  [ $I > 2\sigma(I)$ ],  $wR_2 = 0.0407$  (all data),  $S = 1.043$ . CCDC-717400 and-773501 for **1** and **2** contain the supplementary crystallographic data for this paper.
